Agoston, Heine, Brill et al.\_Fig.S1

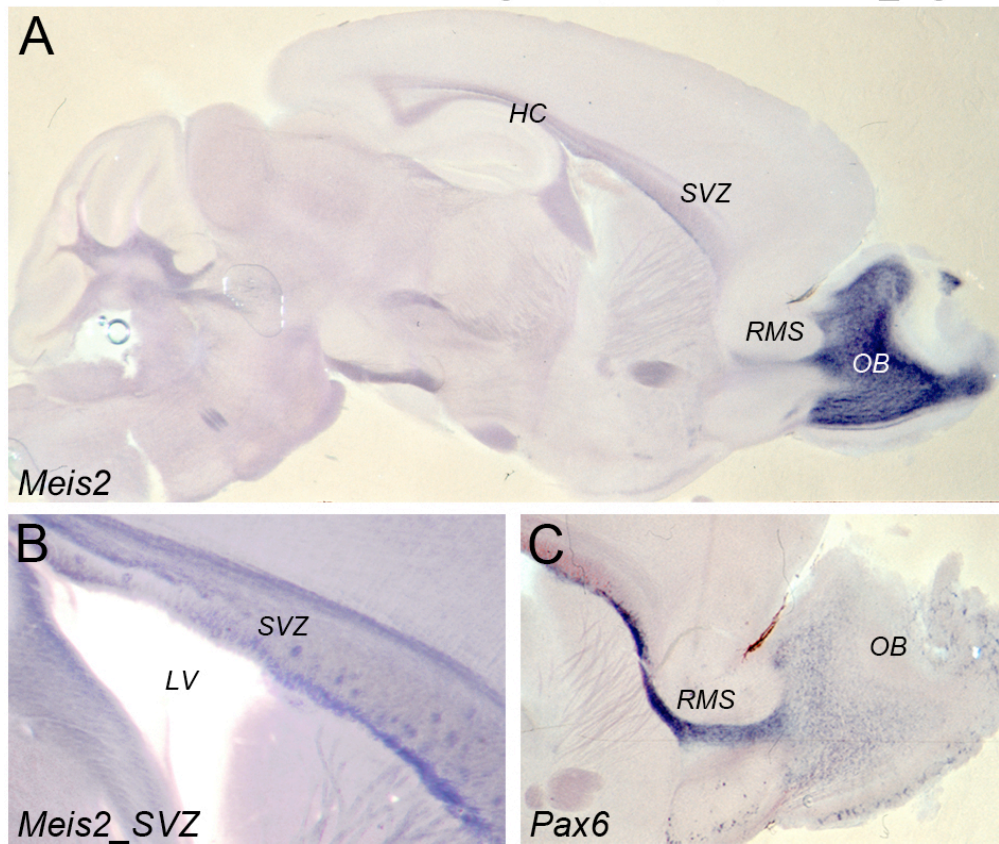

**Supporting Figure 1:** *Meis2* and *Pax6* transcripts in the adult murine brain detected by in situ hybridization on vibratome sections. (A) *Meis2*-specific transcripts on a sagittal section through the brain of a 7 week old mouse; strong expression is detectable in the SVZ-OB neurogenic system. (B) *Meis2*-mRNA in the SVZ. (C) *Pax6* specific transcripts in the SVZ, RMS and OB. Cells in the glomerular layer and neuroblasts that migrate from the RMS laterally into the outer olfactory bulb express *Pax6*. [HC: hippocampus; LV: lateral ventricle; OB: olfactory bulb; RMS: rostral migratory stream; SVZ: subventricular zone]

Agoston, Heine, Brill et al., Fig. S2

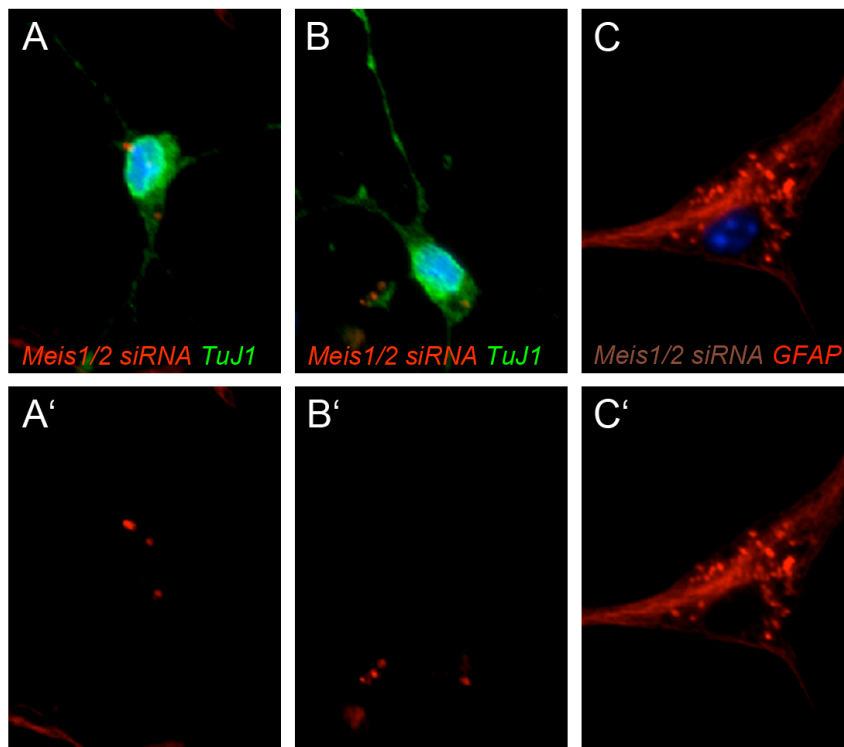

**Supporting Figure 2.** Representative examples of neurosphere cells that were transfected with siRNAs specific for *Meis1* and *Meis2* and allowed to differentiate in vitro for two days. (A, B): cells stained for TuJ1 (green, detected with an Alexa488-coupled secondary antibody); (C) cell stained for GFAP (red, detected with an Alexa594-coupled secondary antibody). The rare TuJ1-expressing neurons generated from *Meis1/2 siRNA* transfected cells exhibited markedly fewer red-fluorescent speckles (indicative of lower uptake of the Cy5-labeled siRNA molecules) than astrocytes generated from *Meis1/2 siRNA* transfected cells. In (A'), (B') and (C') only the red channel is shown for clarity. The fluorescent signals of GFAP and *Meis1/2 siRNA* overlap in (C, C').

## Agoston, Heine, Brill et al.\_Fig.S3

A

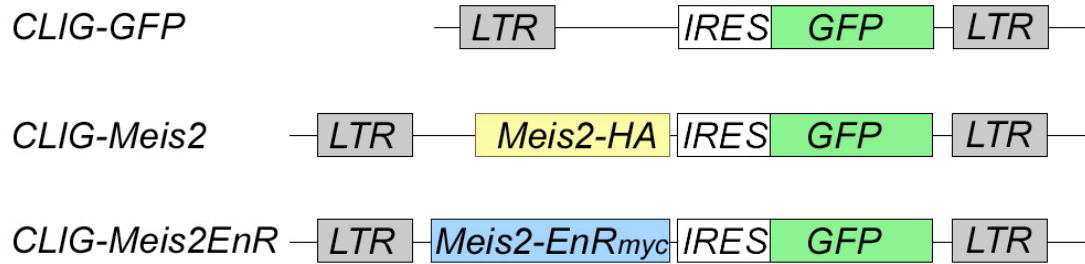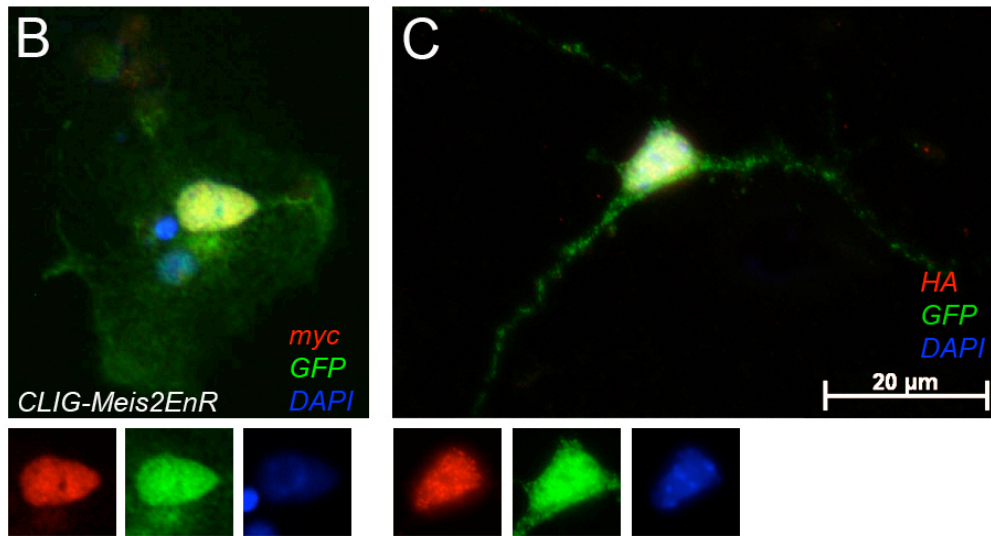

**Supporting Figure 3.** Schematic representation of the retroviral construct used in this study.

(A) All CLIG-derived retroviral vectors express GFP from an internal ribosome entry site (IRES). CLIG-Meis2 contains *Meis2a* C-terminally fused to a triple HA-epitope, CLIG-Meis2EnR contains *Meis2a* fused to the EnR domain of *D. melanogaster* and a single C-terminal myc-epitope. (B, C) Co-expression of GFP with the transgenes in CLIG-Meis2 and CLIG-Meis2EnR. (B) An in vitro differentiated, neurosphere derived cell infected with Meis2EnR exhibits GFP- and nuclear myc staining. (C) An in vitro differentiated, neurosphere derived cell infected with Meis2HA exhibits GFP- and nuclear HA staining.

Agoston, Heine, Brill et al.\_Fig. S4

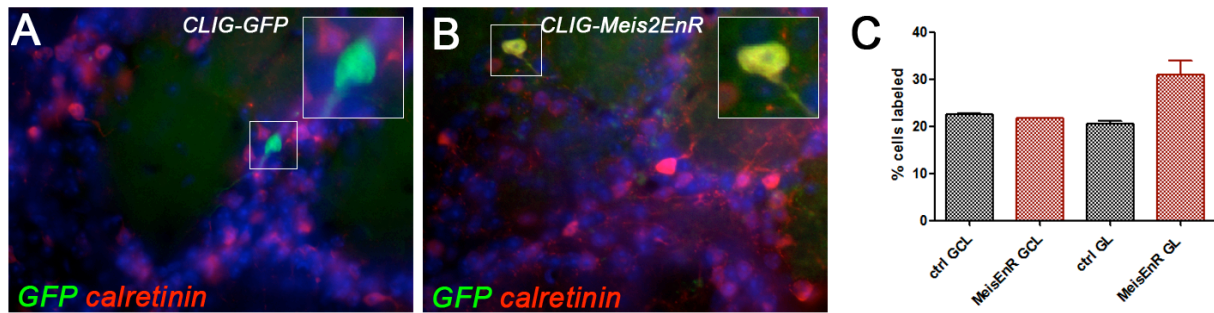

**Supporting Figure 4.** Some Meis2EnR transduced periglomerular neurons acquire a calretinin-positive PGN fate. Images were taken 21 days after the CLIG-GFP control virus or CLIG-Meis2EnR were injected into the RMS, (A) Representative example of a GFP transduced PGN (green) not immunoreactive for calretinin (red); (B) Representative example of a Meis2EnR transduced PGN (green) expressing calretinin (green). (C) Quantification of the results.

## Agoston, Heine, Brill et al.,\_Fig.S5

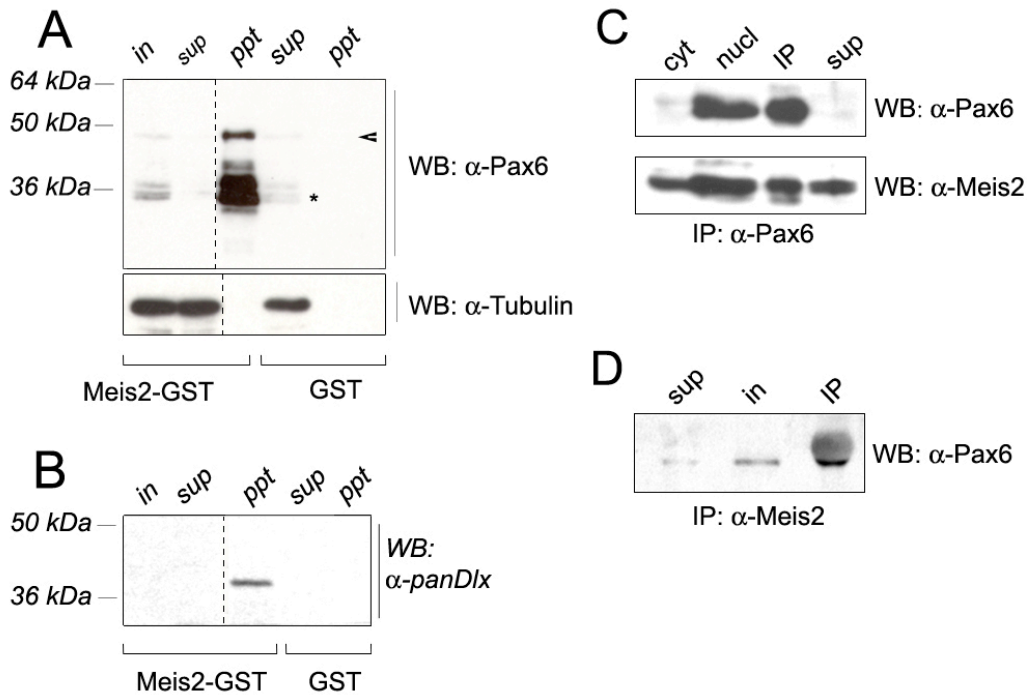

**Supporting Figure 5.** Meis2-Dlx2-Pax6 containing protein complexes exist in the embryonic chick eye. (A) GST pull-down with Meis2-GST or GST alone and protein extracts from HH (Hamburger Hamilton stage) 15-17 embryonic chick eyes. Top panel: Western blot with a Pax6 specific antibody; bottom panel: Western blot with  $\alpha$ -tubulin as control. (B) Same blot as in (A) but re-probed with an antibody with broad specificity for Dlx proteins. Dlx can be enriched by Meis2-GST but not GST alone. The dashed lines indicate that the blot was cut to remove the marker lane. (C) Immunoprecipitation from chick eye extracts with a mouse monoclonal antibody directed against Pax6. Top panel: Western blot with a rabbit polyclonal Pax6-antibody; bottom panel: the same blot as above but re-probed with a rabbit polyclonal antibody specific for Meis2. Meis2 can be successfully co-precipitated with the Pax6. (D) Immunoprecipitation from chick eye extracts with a rabbit polyclonal antibody directed against Meis2. Western blot with a mouse monoclonal Pax6-antibody reveals association of Pax6 with Meis2. [*in*: input; *sup*: supernatant; *ppt*: precipitate of the pull-down; *IP*: immunoprecipitate]



**Agoston, Heine, Brill et al. Fig. S6**

NT -3843

CCATATGAAAGAAAGAAAATAAATCCTTTTGTCTCTCTCAGCCTCGGATACTTCACTCAGTATAT  
 CATTTCGGTTCCACACAATTTCTT GCAAATCTCATAATTT CACATTTTACTGATGGGTGATTAA  
 AATCATGCATATATCTTGCATTTTCAT TACCATTCATCTGTTA ACAGACATCTGGGCTGTTTCT  
 ATTTTCTGGCTTTTGTGAATAGAGCAGCCATAAAACACAGATATGCAAGTGTCTCTATGGTAGGTT  
 ATAGTCTCCTTTGGGTATATGCCAGGAGTGGGAAGGTGAAACATTAAACAATGTTTTACATCAG  
 TCTAAAATGTTTTGGAGTCATGCTGGGCCTAGAGACCTAAGTGTGGCAAATTCAGTAGCCAAG  
 AAGCAGAACAGAGGCTGAAAATTTTCAGCAAATGAGAGGTGAGCCTGGGCTACACAGCGAGTTCC  
 AGAACAACTATCACTATAAAGCTGGACCCTGACTCGATAAAACAACGAACAAAACTTGGAGAA  
 GTGCCACTTTTCAATTCAGCCTTCATGATTCTGCAACTATTTTCCCGTGTACTGTCAATTTAC  
 TATTCCTGCTGACTTCGTTTAAAAACAACAGTGTTGGATGCATGAGCCGAAATGTTAAAAAAT  
 TTACATATTTTTTATTTTCTTTGAAGAAGATAAAAAGAGGAGATCTGTAATTTCTAAGAACTTG  
 ATTTGGCCTGCTGAGTCCAGCCACTAGGCAGAAGGTTTTAGCCAAGTAAAATTGCCAATTTTCTA  
 AGAGAAAGGGCTAGCACATTGCTCATTAGAGCATTCTGAGCTTGCCTGTGCAATCTTTTTTTTCC  
 TACCCTGCAATTTTCTGTGCGTTATAAACGAAACCTTTCTAGCTGTTAATGCAGGCTGTGAATTG  
 AAGAAAAA AAAGCATGTAATTAATCATAGG AGGTTGGGGGTGTTGCTAAGCTTCAGTTACAGGG  
 GAGAAGCTGGACAAGGCACCTAGGACCTAGAAGGCAACTATC CACCTGGCAGGAATTTCTTGCTT  
 GGAGCTCAGACAACAAAGGCATAGAGAGATTGGTTTTCTTCTCTCAGCATCTCCACCAACCAG  
 .....//..... GGTTCACCAAAAT <sup>+1</sup> ATG

**Supporting Figure 6.** Sequence of genomic region upstream of the DCX translational start, which was analyzed in the present study; putative transcription factor binding sites are highlighted: Meis/Pbx (red), Pax4/6 (blue), Dlx (green); + and - indicate location of the consensus binding site on the coding or non coding strand; putative CAAT- and TATAA-boxes are underlined; the location of the primers used for ChIP-qPCR are italicized and marked by arrows.

**Table S1: Antibodies**

| Primary antibodies for immunohistochemistry and Western Blot |            |                                                                                                              |                                                        |
|--------------------------------------------------------------|------------|--------------------------------------------------------------------------------------------------------------|--------------------------------------------------------|
| name                                                         | species    | source                                                                                                       | dilution                                               |
| anti-calbindin                                               | mouse      | Sigma Immunochemicals, Germany, C9848                                                                        | 1:1000                                                 |
| anti-calretinin                                              | mouse      | BD Biosciences, Franklin Lakes, NJ, 610908                                                                   | 1:2000                                                 |
| anti-pan-Dlx                                                 | rabbit     | J. Kohtz, Children's Memorial Hospital and Feinberg School of Medicine, Northwestern University, Chicago, IL | 1:750                                                  |
| anti-doublecortin (DCX)                                      | guinea pig | Millipore Bioscience Research Reagents, Billerica, MA, AB2253                                                | 1:2000                                                 |
| anti-doublecortin (DCX)                                      | rabbit     | Abcam, Cambridge, MA, ab18723                                                                                | 1:2000                                                 |
| anti-GFAP                                                    | mouse      | Sigma Immunochemicals, Germany, G 9269                                                                       | 1:500                                                  |
| anti-GFP                                                     | rabbit     | Molecular Probes, OR                                                                                         | 1:5000                                                 |
| anti-glutamate decarboxylase 67kDa (GAD67)                   | mouse      | Millipore, MAB5406                                                                                           | 1:1000                                                 |
| anti-HA                                                      | rat        | Roche Diagnostics, Germany, 3F10                                                                             | 1:1000                                                 |
| anti-Ascl1 (Mash1)                                           | mouse      | D. Anderson, California Institute of Technology, Pasadena, CA                                                | 1:200                                                  |
| anti-Meis2                                                   | rabbit     | A. Buchberg, Kimmel Cancer Centre, University of Philadelphia Medical School                                 | 1:5000                                                 |
| anti-Meis2                                                   | mouse      | Sigma Immunochemicals, clone 1H4                                                                             | 1:1000                                                 |
| anti-myc                                                     | mouse      | Abcam, Cambridge, MA, ab11917                                                                                | 1:100                                                  |
| anti-Olig2                                                   | rabbit     | Millipore Bioscience Research Reagents, Billerica, MA, AB9610                                                | 1:1000                                                 |
| anti-O4                                                      | mouse      | hybridoma supernatant; M. Schachner, Center for Molecular Neurobiology, Hamburg, Germany                     | 1:5                                                    |
| anti-Pax6                                                    | mouse      | Developmental Studies Hybridoma Bank, IA                                                                     | Purified IgGs: 1:5000 or hybridoma supernatant 1:10    |
| anti-Pax6                                                    | mouse      | clone AB2.38 of (Engelkamp et al., 1999, Development 126(16):3585-96.                                        | Purified IgGs: 1:5000 for Western Blots or supernatant |

|                                   |                |                                                                |                          |
|-----------------------------------|----------------|----------------------------------------------------------------|--------------------------|
|                                   |                |                                                                | 1:10                     |
| anti- Pax6                        | rabbit         | Covance, Princeton, NJ, PRB-278P                               | 1:1000 for Western Blots |
| anti-PSA-NCAM ,                   | mouse          | Millipore Bioscience Research Reagents, Billerica, MA, MAB5324 | 1:1000                   |
| anti-tubulin, isotype III, (TuJ1) | mouse          | Covance, Princeton, NJ, MMS435P                                | 1:1000                   |
| anti-tyrosine hydroxylase (TH)    | mouse          | Millipore Bioscience Research Reagents, MAB5280                | 1:500                    |
| <b>Antibodies for ChIP</b>        |                |                                                                |                          |
| <b>name</b>                       | <b>species</b> | <b>source</b>                                                  |                          |
| anti-Meis2 N-17X                  | goat           | Santa Cruz Biotechnology, Santa Cruz, CA, sc-10600             |                          |
| anti-Pax6                         | mouse          | purified IgGs, Developmental Studies Hybridoma Bank, IA        |                          |
| anti-pan-Dlx                      | rabbit         | J. Kohtz, Northwestern University, Chicago, IL                 |                          |
| anti-RNA Pol II                   | mouse          | Merck Millipore, Germany, clone CTD4H8                         |                          |
| Normal IgG control                | mouse          | Merck Millipore / Upstate, # 12-371B from EZ-ChIP Kit # 17-371 |                          |

Secondary antibodies for immunohistochemistry were Alexa 594-, Alexa 488-, Cy2 or Cy3 conjugated (Molecular Probes, OR, Invitrogen, Karlsruhe, Germany or Dianova, Hamburg, Germany). Some sections were counterstained with 4'-6-Diamidino-2-phenylindole (DAPI) to visualize cell nuclei. Stainings were analyzed with either a LSM5 confocal microscope (Zeiss, Germany), an Axioplan2 with deconvolution software, or an Olympus FV1000 laser-scanning confocal microscope with optical sections of maximum 1–2  $\mu\text{m}$  intervals.



**Table S2: Primer Sequences for ChIP**

| <b>name</b>  | <b>sequence</b>                       | <b>amplicon</b> |
|--------------|---------------------------------------|-----------------|
| DCXI for     | 5'- CTCGGATACTTCACTCAGTATATC          |                 |
| DCXI rev     | 5'- GCATATCTGTGTTTATGGCTGC            | 178bp           |
| DCXII for    | 5'- AAACCTTTCTAGCTGTTAATGCAGG         |                 |
| DCXII rev    | 5'- CTCCAAGCAAGAAATTCCTGCCAGGGTG      | 174bp           |
| TH1 for      | 5'- CCTCTTTAGTTTCCTGATGTCCTGG         |                 |
| TH1 rev      | 5'- GCCTGTGGAGCAGGCAACAGAAGG          | 192bp           |
| TH2 for      | 5'- GTCTCCTGTCCCAGAACACCAGCC          |                 |
| TH2 rev      | 5'- TAAAGGCCAGGCTGACGTCAAAGC          | 245bp           |
| GAPDH        | #PP1045500, Diagenode, Liège, Belgium |                 |
| Myogenin for | 5'- CAAATTACAGCCGACGGCCTC             |                 |
| Myogenin rev | 5-' GAAAAGGCTTGTTTCCTGCCACTG          | 284bp           |

**Table S3: Total number of Meis2-immunoreactive cells in the SVZ, RMS and OB analyzed**

| antigen                   | % of cells co-labeled with Meis2 | total number of cell counted                        |
|---------------------------|----------------------------------|-----------------------------------------------------|
| <b>SVZ/RMS</b>            |                                  |                                                     |
| DCX                       | 98.7%                            | 1678 cells, 3 animals                               |
| TuJ1                      | 95.1%                            | 870 cells, 3 animals                                |
| PSA-NCAM                  | 99.3%                            | 772 cells, 3 animals                                |
| <b>OB</b>                 |                                  |                                                     |
| tyrosine hydroxylase, TH  | 94.4% (+/- 3.1%)                 | 1913 cells, 3 animals                               |
| calbindin                 | 62.9% (+/- 2.1%)                 | 2571 cells, 4 animals                               |
| calretinin                | 28.3% (+/- 1.4%)                 | 2121 cells, 3 animals                               |
| Pax6                      | 83.5% (+/- 2.5%)                 | 1010 cells, 3 animals                               |
| GAD67:GFP                 | 86.8% (+/- 3.7%)                 | 3287 cells, 3 animals                               |
| BrdU (3w pulse, 3w chase) | GCL: 87.5%<br>GL: 57.3%          | GCL: 512 cells, 1 animal<br>GL: 128 cells, 1 animal |

**Table S4: Total number of number of cells analyzed following differentiation of neurosphere cells in vitro****A: in vitro differentiation of neurosphere cells following siRNA mediated knock-down**

| <b>experimental design</b> | <b>number of independent experiments</b> | <b>total number of cell counted</b> |
|----------------------------|------------------------------------------|-------------------------------------|
| ctrl. siRNA                | 3                                        | 1820                                |
| Meis1/2 siRNA              | 3                                        | 1645                                |

**B: in vitro differentiation of neurosphere cells following retroviral transduction**

| <b>experimental design:<br/>viral vector / marker /<br/>differentiation duration</b> | <b>number of independent experiments</b> | <b>% cells generated</b> | <b>total number of cell counted</b> |
|--------------------------------------------------------------------------------------|------------------------------------------|--------------------------|-------------------------------------|
| CLIG-GFP/ TuJ1 / 3d differentiation                                                  | 6                                        | 11.48 (+/- 0.297 s.e.m.) | 3185                                |
| CLIG-GFP/ GFAP / 3d differentiation                                                  | 6                                        | 48.44 (+/- 6.28 s.e.m.)  | 3030                                |
| CLIG-Meis2HA/ TuJ1 / 3d differentiation                                              | 3                                        | 11.39 (+/- 0.695 s.e.m.) | 3475                                |
| CLIG-Meis2HA/ GFAP / 3d differentiation                                              | 3                                        | 32.96 (+/- 0.1 s.e.m)    | 3521                                |
| CLIG-Meis2EnR/ TuJ1 / 3d differentiation                                             | 3                                        | 6.51 (+/- 0.178 s.e.m.)  | 3219                                |
| CLIG-Meis2EnR/ GFAP / 3d differentiation                                             | 3                                        | 52.19 (+/- 8.50 s.e.m.)  | 2780                                |
| CLIG-GFP/ TuJ1 / 7d differentiation                                                  | 7                                        | 32.49 (+/- 4.37 s.e.m.)  | 1944                                |
| CLIG-GFP/ GFAP / 7d differentiation                                                  | 3                                        | 49.37 (+/- 0.61 s.e.m.)  | 2126                                |
| CLIG-GFP/ O4 / 7d differentiation                                                    | 3                                        | 4.38 (+/- 0.53 s.e.m.)   | 1391                                |
| CLIG-Meis2HA/ TuJ1 / 7d differentiation                                              | 3                                        | 26.7 (+/- 10.37 s.e.m.)  | 1807                                |
| CLIG-Meis2HA/ GFAP / 7d differentiation                                              | 3                                        | 53.03 (+/- 1.92 s.e.m.)  | 1716                                |
| CLIG-Meis2HA/ O4 / 7d differentiation                                                | 3                                        | 7.98 (+/- 0.695 s.e.m.)  | 1082                                |
| CLIG-Meis2EnR/ TuJ1 / 7d differentiation                                             | 5                                        | 10.99 (+/- 2.53 s.e.m.)  | 1853                                |
| CLIG-Meis2EnR/ GFAP / 7d differentiation                                             | 3                                        | 64.54 (+/- 1.9 s.e.m.)   | 1535                                |
| CLIG-Meis2EnR/ O4 / 7d differentiation                                               | 3                                        | 5.485 (+/- 0.665 s.e.m.) | 1034                                |

**Table S5: Total number of cells counted following in vivo transduction**

| <b>experimental design:<br/>viral vector / injection site / days post<br/>injection / marker</b> | <b>number of<br/>injected brain<br/>hemispheres</b> | <b>total number of cell<br/>counted</b> |
|--------------------------------------------------------------------------------------------------|-----------------------------------------------------|-----------------------------------------|
| CLIG-GFP, SVZ, 3d, PSA-NCAM                                                                      | 4                                                   | 177                                     |
| CLIG-Meis2, SVZ, 3d, PSA-NCAM                                                                    | 4                                                   | 104                                     |
| CLIG-Meis2EnR, SVZ, 3d, PSA-NCAM                                                                 | 6                                                   | 132                                     |
| CLIG-GFP, SVZ, 4d, GFAP                                                                          | 4                                                   | 963                                     |
| CLIG-Meis2EnR, SVZ 4d GFAP                                                                       | 6                                                   | 336                                     |
| CLIG-GFP, SVZ, 10d, GFAP                                                                         | 2                                                   | 113                                     |
| CLIG-Meis2EnR, SVZ 10d GFAP                                                                      | 4                                                   | 30                                      |
| CLIG-GFP, RMS, 21d, Pax6                                                                         | 4                                                   | 571                                     |
| CLIG-Meis2EnR, RMS, 21d, Pax6                                                                    | 4                                                   | 98                                      |
| CLIG-GFP, RMS, 21d, TH                                                                           | 4                                                   | 462                                     |
| CLIG-Meis2, RMS, 21d, TH                                                                         | 4                                                   | 109                                     |
| CLIG-Meis2EnR, RMS, 21d, TH                                                                      | 7                                                   | 246                                     |
| CLIG-GFP, RMS, 60d, TH                                                                           | 4                                                   | 312                                     |
| CLIG-Meis2, RMS, 60d, TH                                                                         | 5                                                   | 153                                     |
| CLIG-Meis2EnR, RMS, 60d, TH                                                                      | 5                                                   | 88                                      |
| CLIG-Meis2EnR, RMS, 21d, Nestin                                                                  | 4                                                   | 105                                     |
| CLIG-Meis2EnR, RMS, 21d, TuJ1                                                                    | 4                                                   | 44                                      |
| CLIG-GFP, RMS, 21d, GAD67                                                                        | 4                                                   | 225                                     |
| CLIG-Meis2EnR, RMS, 21d, GAD67                                                                   | 4                                                   | 172                                     |
| CLIG-GFP, RMS, 21d, calretinin                                                                   | 2                                                   | 168                                     |
| CLIG-Meis2EnR, RMS, 21d, calretinin                                                              | 2                                                   | 128                                     |
| CLIG-GFP, RMS, 21d, calbindin                                                                    | 2                                                   | 107                                     |
| CLIG-Meis2EnR, RMS, 21d, calbindin                                                               | 2                                                   | 85                                      |
